# Supplementary material
Source: publisher site journal article supplement (https://www.spandidos-publications.com/7/downloadSupplementary)

Figure S1. Receiver operating characteristics curve for neutrophil-to-lymphocyte ratio for relapse-free survival. The cutoff value was set at 2.72 (area under the curve, 0.566; sensitivity, 0.466; specificity, 0.668; P=0.1598).

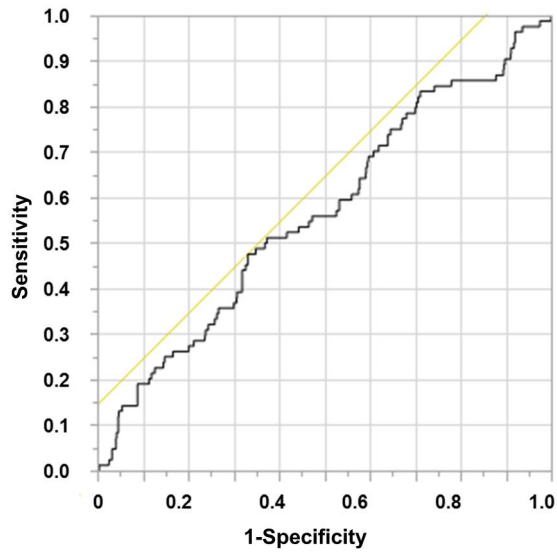

Supplement: Supplementary file 1 [file downloadSupplementary]
